# Supplementary material for: Baseline Data of the Fungal Phytobiome of Three Sorghum (Sorghum bicolor) Cultivars in South Africa using Targeted Environmental Sequencing
Source: MDPI journal article supplement (doi:10.3390/jof7110978), 2021-11-17
Supplement: s1 [file s1]

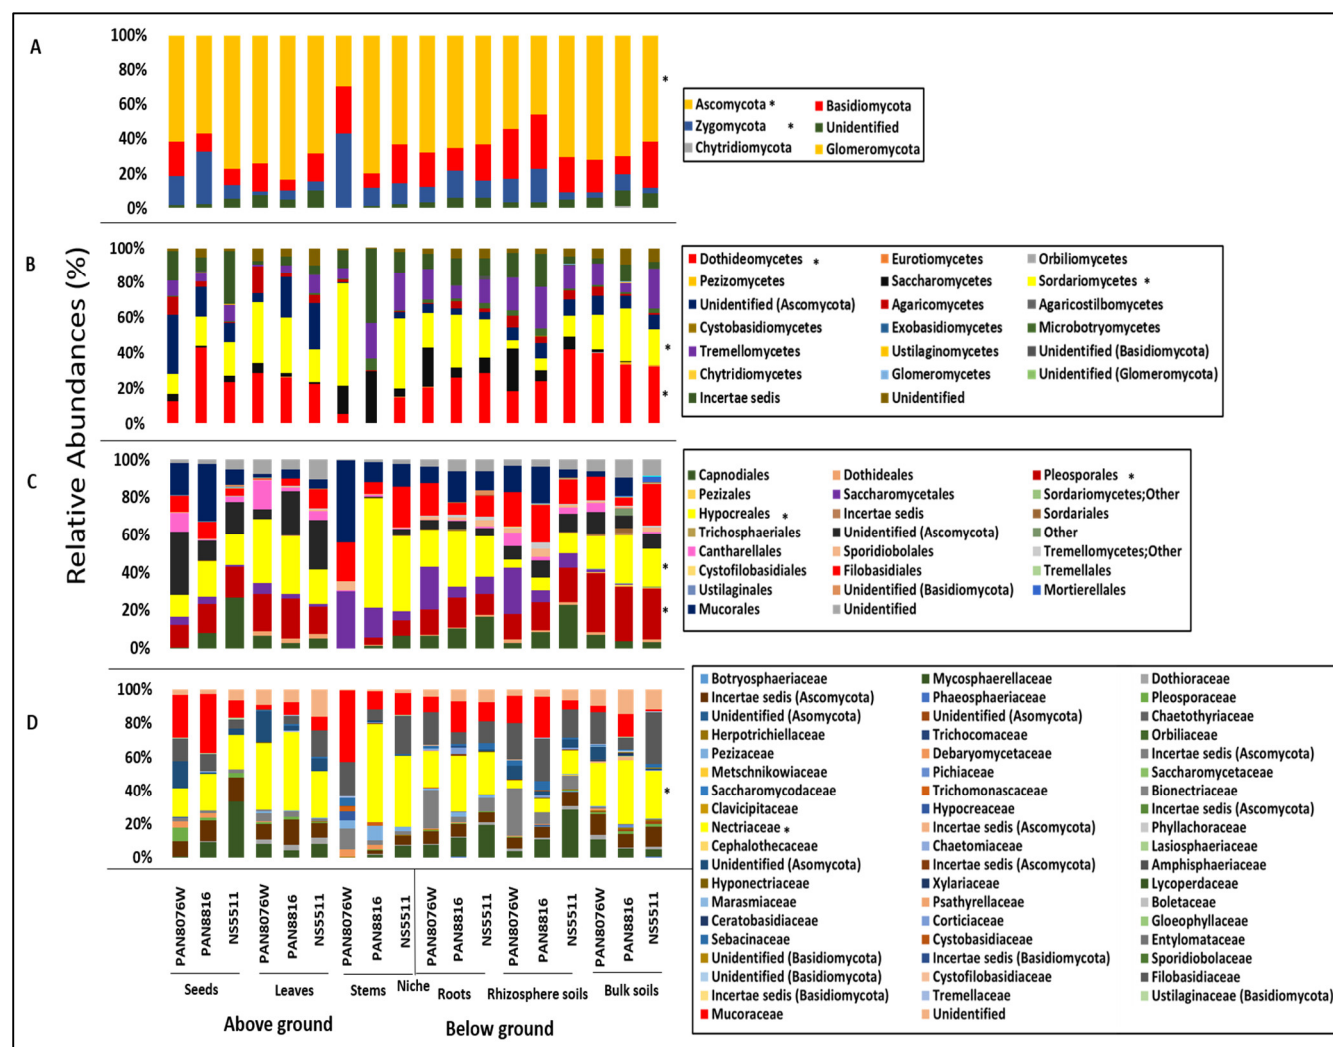

**Figure S1.** Bar charts of mycobiomes detected in the three sorghum cultivars (PAN8706W, PAN8816, N5511) at different taxonomic ranks: (A) Phyla, (B) Classes, (C) Orders, (D) Families. The asterisks (\*) denote the mostly abundant group for each of the cultivars at the different taxonomic levels.

**Table S1.** Summary of the relative abundance (%) of Molecular Operational Taxonomic Units (MOTUs) taxa that were assigned at Phyla level for the different sorghum cultivars (above and below ground niche).

| Phylum             | Aboveground |         |        |          |         |        |          |         |        | Belowground |         |        |                   |         |        |            |         |        |
|--------------------|-------------|---------|--------|----------|---------|--------|----------|---------|--------|-------------|---------|--------|-------------------|---------|--------|------------|---------|--------|
|                    | Seed        |         |        | Leaves   |         |        | Stems    |         |        | Roots       |         |        | Rhizosphere soils |         |        | Bulk soils |         |        |
|                    | PAN8076W    | PAN8816 | NS5511 | PAN8076W | PAN8816 | NS5511 | PAN8076W | PAN8816 | NS5511 | PAN8076W    | PAN8816 | NS5511 | PAN8076W          | PAN8816 | NS5511 | PAN8076W   | PAN8816 | NS5511 |
| <b>Ascomycota*</b> | 61.6        | 56.9    | 77.5   | 73.9     | 83.4    | 68.2   | 29.8     | 80.1    | 63.2   | 67.6        | 65.3    | 63.2   | 54.4              | 45.7    | 70.3   | 72.1       | 69.8    | 61.5   |
| Basidiomycota      | 19.7        | 10.7    | 9.5    | 16.5     | 6.7     | 16.5   | 27.0     | 8.2     | 22.6   | 20.3        | 13.2    | 20.6   | 28.7              | 31.9    | 20.4   | 19.0       | 10.4    | 26.7   |
| Unidentified       | 1.9         | 2.0     | 5.1    | 7.4      | 5.0     | 10.1   | 0.2      | 1.2     | 2.1    | 3.5         | 5.9     | 6.1    | 3.0               | 3.4     | 4.9    | 6.0        | 9.2     | 8.1    |
| Zygomycota         | 16.8        | 30.4    | 7.9    | 2.2      | 4.9     | 5.2    | 43.1     | 10.5    | 12.1   | 8.6         | 15.6    | 10.0   | 13.9              | 18.9    | 4.2    | 2.7        | 9.4     | 3.5    |
| Chytridiomycota    |             |         |        |          |         |        |          |         |        |             |         |        |                   |         |        | 0.1        | 0.9     | 0.1    |
| Glomeromycota      |             |         |        |          |         |        |          |         |        |             |         |        |                   | 01      | 0.1    |            | 0.2     | 0.1    |

<sup>1</sup> Phylum followed by an asterisk and bold indicate the most abundant in relative abundance, whilst MOTUs with zero % were left blank in the table. Names are used as assigned by the UNITE database.

**Table S2.** Summary of the relative abundance (%) of Molecular Operational Taxonomic Units (MOTUs) taxa that were assigned at Class level for the different sorghum cultivars (above and below ground niche).

[illegible]

|                      |      |     |      |     |     |      |      |      |      |     |      |      |      |      |     |     |     |     |
|----------------------|------|-----|------|-----|-----|------|------|------|------|-----|------|------|------|------|-----|-----|-----|-----|
| <b>Glomeromycota</b> |      |     |      |     |     |      |      |      |      |     |      |      |      |      |     |     |     |     |
| Glomeromycetes       |      |     |      |     |     |      |      |      |      |     |      |      |      |      | 0.1 |     | 0.2 | 0.1 |
| Unidentified         |      |     |      |     |     |      |      |      |      |     |      |      |      | 0.1  | 0.1 |     | 0.1 | 0.1 |
| <b>Zygomycota</b>    |      |     |      |     |     |      |      |      |      |     |      |      |      |      |     |     |     |     |
| Incertae sedis       | 16.8 | 7.9 | 30.4 | 2.2 | 4.9 | 5.2  | 10.5 | 43.1 | 12.1 | 8.6 | 15.6 | 10.0 | 13.9 | 18.9 | 4.2 | 2.7 | 9.4 | 3.5 |
| <b>Unidentified</b>  | 1.9  | 5.1 | 2.0  | 7.4 | 5.0 | 10.1 | 1.2  | 0.2  | 2.1  | 3.5 | 5.9  | 6.1  | 3.0  | 3.4  | 4.9 | 6.0 | 9.2 | 8.1 |

Class followed by an asterisk and bold indicate the most abundant in relative abundance, whilst MOTUs with zero % were left blank in the table. Names are used as assigned by the UNITE database.

**Table S3.** Summary of the relative abundance (%) of Molecular Operational Taxonomic Units (MOTUs) taxa that were assigned at Order level for the different sorghum cultivars (above and below ground niche).

| Order                 | Aboveground  |             |            |              |             |            |              |             |            | Belowground  |             |            |                   |             |            |              |             |            |
|-----------------------|--------------|-------------|------------|--------------|-------------|------------|--------------|-------------|------------|--------------|-------------|------------|-------------------|-------------|------------|--------------|-------------|------------|
|                       | Seed         |             |            | Leaves       |             |            | Stems        |             |            | Roots        |             |            | Rhizosphere soils |             |            | Bulk soils   |             |            |
|                       | PAN8076<br>W | PAN<br>8816 | NS55<br>11 | PAN8076<br>W | PAN88<br>16 | NS55<br>11 | PAN8076<br>W | PAN88<br>16 | NS55<br>11 | PAN8076<br>W | PAN88<br>16 | NS55<br>11 | PAN8076<br>W      | PAN88<br>16 | NS55<br>11 | PAN8076<br>W | PAN88<br>16 | NS55<br>11 |
| <b>Ascomycota</b>     |              |             |            |              |             |            |              |             |            |              |             |            |                   |             |            |              |             |            |
| Capnodiales           | 0.2          | 7.8         | 26.5       | 6.4          | 2.7         | 5.0        |              | 1.3         | 6.4        | 63           | 10.0        | 16.4       | 2.8               | 8.2         | 22.1       | 6.8          | 3.3         | 32         |
| Dothideales           |              | 0.1         |            | 2.5          | 2.2         | 2.6        |              | 0.4         | 0.3        | 0.8          | 0.2         | 1.1        | 1.6               | 0.9         | 1.7        | 1.5          | 0.3         | 1.0        |
| <b>Pleosporales*</b>  | 12.3         | 15.3        | 16.2       | 19.8         | 21.2        | 14.5       |              | 3.6         | 8.1        | 13.2         | 15.5        | 10.8       | 13.4              | 14.6        | 17.6       | 30.5         | 27.4        | 26.2       |
| Pezizales             |              |             |            |              |             |            |              |             |            |              |             |            |                   |             | 0,1        | 0,1          | 1,0         | 0,3        |
| Saccharomycetales     | 4.3          | 3.6         | 1.3        | 5.4          | 2.5         | 1.5        | 29.3         | 15.8        | 4.8        | 22.3         | 5.4         | 8.8        | 24.3              | 6.0         | 7.3        | 1.6          | 0.3         | 0.1        |
| Sordariomycetes;Other |              |             |            |              |             |            |              |             |            |              |             |            |                   |             | 0,2        | 0,6          | 0,5         | 0,1        |
| <b>Hypocreales*</b>   | 11.3         | 19.0        | 16.2       | 34.1         | 30.6        | 17.9       |              | 57.7        | 39.6       | 19.5         | 28.6        | 21.4       | 4.4               | 6.3         | 10.8       | 16.6         | 24.5        | 19.5       |
| Incertae_sedis        |              |             |            | 0.1          | 0.1         |            |              |             |            | 0.1          | 0.1         |            |                   |             |            | 0.5          | 1.3         | 0.1        |
| Sordariales           |              |             |            |              |             |            |              |             |            |              |             | 0.1        |                   |             | 0.2        | 1.2          | 2.0         | 0.1        |
| Trichosphaeriales     |              | 0.1         |            |              | 0.2         | 0.2        |              | 0.6         |            |              | 1.0         |            |                   |             | 0.2        |              | 0.1         |            |
| Unidentified          | 33.4         | 10.8        | 16.8       | 5.3          | 23.5        | 26.3       |              | 0.4         | 3.6        | 4.7          | 3.9         | 4.2        | 7.3               | 8.8         | 9.2        | 10.8         | 6.7         | 7.8        |
| <b>Basidiomycota</b>  |              |             |            |              |             |            |              |             |            |              |             |            |                   |             |            |              |             |            |
| Other                 |              |             |            |              |             |            |              |             |            |              |             |            |                   |             |            | 0,2          | 3,4         |            |
| Cantharellales        | 10.4         | 0.2         | 3.0        | 15.3         | 1.8         | 4.6        | 0.5          | 0.9         | 0.5        | 0.2          | 0.7         | 0.8        | 6.7               | 1.9         | 3.5        | 4.8          | 0.2         | 0.6        |
| Sporidiobolales       | 0.2          | 0.6         | 0.2        | 0.2          | 0.7         | 0.9        | 5.0          | 0.4         | 0.3        | 1.8          | 1.4         | 3.4        | 2.7               | 4.3         | 1.1        | 0.8          | 0.7         | 2.4        |
| Tremellomycetes;Other |              | 0,2         | 0,1        |              | 0,5         | 0,7        | 0,1          |             | 0,2        | 0,2          | 1,1         | 1,9        | 0,3               | 3,0         | 0,5        | 0,5          | 0,4         | 1,0        |
| Cystofilobasidiales   |              |             |            |              |             |            |              |             |            | 0,3          |             |            | 0,6               |             |            |              |             |            |
| Filobasidiales        | 8.7          | 8.8         | 4.3        | 0.8          | 3.5         | 9.9        | 20.1         | 6.0         | 21.3       | 17.0         | 5.9         | 11.0       | 18.0              | 20.0        | 12.9       | 11.9         | 4.4         | 21.2       |
| Tremellales           |              |             | 0.1        | 0.1          | 0.1         | 0.1        |              |             | 0.1        | 0.0          | 0.1         | 0.1        | 0.1               | 0.5         | 0.1        |              | 0.2         | 0.6        |
| Ustilaginales         | 0.3          | 0.6         | 0.9        |              |             |            |              | 0.1         | 0.1        |              |             |            |                   | 0.1         |            | 0.1          | 0.1         | 0.1        |
| Unidentified          |              |             | 0.9        |              |             | 0.3        |              |             |            |              | 0.6         | 2.4        |                   | 0.1         | 0.7        |              | 0.1         | 0.1        |

|                        |      |      |     |     |     |      |      |      |      |     |      |     |      |      |     |     |     |     |     |
|------------------------|------|------|-----|-----|-----|------|------|------|------|-----|------|-----|------|------|-----|-----|-----|-----|-----|
| <b>Chytridiomycota</b> |      |      |     |     |     |      |      |      |      |     |      |     |      |      |     |     |     |     |     |
| Rhizophydiales         |      |      |     |     |     |      |      |      |      |     |      |     |      |      |     |     |     | 0.5 |     |
| Spizellomycetales      |      |      |     |     |     |      |      |      |      |     |      |     |      |      |     |     |     | 0.1 | 0.1 |
| <b>Glomeromycota</b>   |      |      |     |     |     |      |      |      |      |     |      |     |      |      |     |     |     |     |     |
| Glomerales             |      |      |     |     |     |      |      |      |      |     |      |     |      |      |     |     |     | 0.2 |     |
| Unidentified           |      |      |     |     |     |      |      |      |      |     |      |     |      |      |     |     |     | 0.1 | 0.1 |
| <b>Zygomycota</b>      |      |      |     |     |     |      |      |      |      |     |      |     |      |      |     |     |     |     |     |
| Mortierellales         |      |      |     |     |     |      |      |      |      |     |      |     | 0,1  |      | 0,2 |     | 0,2 | 0,3 | 2,9 |
| Mucorales              | 16.8 | 30.4 | 7.9 | 2.2 | 4.9 | 5.2  | 43.1 | 10.5 | 12.1 | 8.6 | 15.5 | 9.9 | 13.9 | 18.8 | 4.2 | 2.5 | 9.1 | 0.6 |     |
| <b>Unidentified</b>    |      |      |     |     |     |      |      |      |      |     |      |     |      |      |     |     |     |     |     |
| Unidentified           | 1.9  | 2.0  | 5.1 | 7.4 | 5.0 | 10.1 | 0.2  | 1.2  | 2.1  | 3.5 | 5.9  | 6.1 | 3.0  | 3.4  | 4.9 | 6.0 | 9.2 | 8.1 |     |

Order followed by an asterisk and bold indicate the most abundant in relative abundance, whilst MOTUs with zero % were left blank in the table. Names are used as assigned by the UNITE database.

**Table S4.** Summary of the relative abundance (%) of Molecular Operational Taxonomic Units (MOTUs) taxa that were assigned at Family level for the different sorghum cultivars (above and below ground niche).

| Family             | Aboveground |       |       |         |       |       |         |       |       | Belowground |       |       |                   |       |       |            |       |       |
|--------------------|-------------|-------|-------|---------|-------|-------|---------|-------|-------|-------------|-------|-------|-------------------|-------|-------|------------|-------|-------|
|                    | Seed        |       |       | Leaves  |       |       | Stems   |       |       | Roots       |       |       | Rhizosphere soils |       |       | Bulk soils |       |       |
|                    | PAN8076     | PAN88 | NS551 | PAN8076 | PAN88 | NS551 | PAN8076 | PAN88 | NS551 | PAN8076     | PAN88 | NS551 | PAN8076           | PAN88 | NS551 | PAN8076    | PAN88 | NS551 |
|                    | W           | 16    | 1     | W       | 16    | 1     | W       | 16    | 1     | W           | 16    | 1     | W                 | 16    | 1     | W          | 16    | 1     |
| <b>Ascomycota</b>  |             |       |       |         |       |       |         |       |       |             |       |       |                   |       |       |            |       |       |
| Mycosphaerellaceae | 0.2         | 7.8   | 27.0  | 6.4     | 2.7   | 5.0   |         | 1.2   | 6.4   | 6.3         | 10.0  | 16.0  | 2.8               | 8.2   | 22.0  | 6.8        | 3.3   | 3.2   |
| Dothioraceae       |             | 0.1   |       | 2.5     | 2.2   | 2.6   |         | 0.4   | 0.3   | 0.8         | 0.2   | 1.1   | 1.6               | 0.9   | 1.7   | 1.5        | 0.3   | 1.0   |
| Pleosporales;Other | 0.9         | 3.0   | 2.6   | 11.2    | 11.0  | 8.6   |         | 0.7   | 2.7   | 5.9         | 8.6   | 5.3   | 7.5               | 9.0   | 10.0  | 21.9       | 21.0  | 17.0  |
| Incertae sedis     | 6.1         | 11.0  | 11.0  | 7.5     | 9.5   | 5.2   |         | 2.6   | 5.2   | 6.8         | 6.6   | 5.3   | 5.5               | 5.1   | 7.1   | 7.9        | 5.2   | 8.2   |
| Pleosporaceae      | 5.3         | 1.2   | 2.3   | 1.1     | 1.1   | 0.6   |         | 0.4   | 0.1   | 0.4         | 0.2   | 0.2   | 0.4               | 0.4   | 0.5   | 0.7        | 1.2   | 0.9   |
| Unidentified       |             |       |       |         |       |       |         |       |       |             |       |       | 0.1               |       | 0.2   | 0.5        | 0.7   | 1.3   |
| Pezizaceae         |             |       |       |         |       |       |         |       |       |             |       |       |                   |       | 0.1   | 0.1        | 1.0   | 0.3   |
| Debaryomycetaceae  | 2.5         | 2.4   | 0.1   | 0.1     | 0.1   | 0.1   | 4.0     | 2.7   | 0.1   | 0.3         | 0.3   | 0.1   | 0.2               | 0.3   |       | 0.6        |       |       |
| Incertae sedis     | 1.4         | 1.1   | 1.1   | 4.3     | 2.2   | 1.2   | 12.7    | 2.3   | 2.0   | 20.6        | 2.8   | 6.6   | 24.0              | 5.5   | 6.3   | 0.8        | 0.2   | 0.1   |
| Pichiaceae         |             | 0.1   | 0.1   | 1.0     | 0.1   |       | 4.8     | 8.4   | 2.6   | 0.8         | 2.3   | 1.4   | 0.1               | 0.2   | 0.7   | 0.1        |       |       |
| Saccharomycodaceae | 0.3         |       |       |         |       | 0.1   | 5.4     |       | 0.1   | 0.5         |       | 0.7   |                   |       |       |            |       |       |
| Trichomonascaceae  |             |       |       |         |       |       | 2.5     | 2.4   | 0.1   | 0.1         |       |       |                   |       |       |            |       |       |
| Bionectriaceae     |             |       |       | 0.6     |       |       |         |       |       | 0.1         |       |       |                   |       |       |            |       |       |
| Nectriaceae*       | 11.3        | 19.0  | 16.0  | 33.3    | 31.0  | 18.0  |         | 58.0  | 40.0  | 19.4        | 28.0  | 21.0  | 4.4               | 6.3   | 11.0  | 16.5       | 25.0  | 19.5  |
| Incertae_sedis     |             |       |       | 0.1     | 0.1   |       |         |       |       | 0.1         |       |       |                   |       |       | 0.5        | 1.3   | 0.1   |
| Sordariales;Other  |             |       |       |         |       |       |         |       |       |             |       |       |                   |       |       | 0.8        | 0.6   |       |
| Incertae sedis     |             | 0.1   |       |         | 0.2   | 0.2   |         | 0.6   |       | 0.2         | 1.0   |       |                   |       | 0.2   |            | 0.1   |       |
| Unidentified       | 33.4        | 10.8  | 17.0  | 5.3     | 23.5  | 26.3  |         | 0.4   | 3.6   | 4.7         | 3.9   | 4.2   | 7.3               | 8.8   | 9.2   | 10.8       | 6.7   | 7.8   |

|                        |      |      |     |      |     |      |      |      |      |      |      |      |      |      |      |      |     |      |
|------------------------|------|------|-----|------|-----|------|------|------|------|------|------|------|------|------|------|------|-----|------|
| <b>Basidiomycota</b>   |      |      |     |      |     |      |      |      |      |      |      |      |      |      |      |      |     |      |
| Marasmiaceae           |      |      |     |      | 0.1 |      |      | 0.6  |      | 0.3  | 3.2  | 0.2  | 0.2  | 1.5  | 1.0  |      |     | 0.1  |
| Ceratobasidiaceae      | 10.4 | 0.2  | 3.0 | 15.3 | 1.8 | 4.6  | 0.5  | 0.9  | 0.5  | 0.2  | 0.7  | 0.8  | 6.7  | 1.9  | 3.5  | 4.8  | 0.2 | 0.6  |
| Other                  |      |      |     |      |     | 0.1  |      | 0.3  | 0.1  | 0.1  | 0.2  | 0.3  |      | 0.1  | 0.1  | 0.3  | 0.3 | 0.9  |
| Incertae sedis         | 0.2  | 0.6  | 0.1 | 0.2  | 0.7 | 0.8  | 5.0  | 0.1  | 0.2  | 1.8  | 1.2  | 3.1  | 2.6  | 4.2  | 1.0  | 0.5  | 0.5 | 1.5  |
| Unidentified           |      | 0.1  |     |      |     |      | 1.3  | 0.1  | 0.2  |      |      |      |      |      |      | 0.1  |     | 0.1  |
| Cystofilobasidiaceae   |      |      |     |      |     |      |      |      |      | 0.3  |      |      | 0.6  |      |      |      |     |      |
| Filobasidiaceae        | 8.7  | 8.8  | 4.3 | 0.8  | 3.5 | 9.9  | 20.1 | 6.0  | 21.3 | 17.0 | 5.9  | 11.0 | 18.0 | 20.0 | 12.9 | 11.9 | 4.4 | 21.2 |
| Ustilaginaceae         | 0.3  | 0.6  | 0.9 |      |     |      |      | 0.1  | 0.1  |      |      |      |      | 0.1  |      | 0.1  | 0.1 | 0.1  |
| Unidentified           |      |      | 0.9 |      |     | 0.3  |      |      |      |      | 0.6  | 2.4  |      | 0.1  | 0.7  |      | 0.1 | 0.1  |
| <b>Chytridiomycota</b> |      |      |     |      |     |      |      |      |      |      |      |      |      |      |      |      |     |      |
| Rhizophydiales         |      |      |     |      |     |      |      |      |      |      |      |      |      |      |      |      | 0.5 |      |
| Spizellomycetales      |      |      |     |      |     |      |      |      |      |      |      |      |      |      |      |      | 0.1 | 0.1  |
| <b>Glomeromycota</b>   |      |      |     |      |     |      |      |      |      |      |      |      |      |      |      |      |     |      |
| Glomerales             |      |      |     |      |     |      |      |      |      |      |      |      |      |      |      |      | 0.2 |      |
| Unidentified           |      |      |     |      |     |      |      |      |      |      |      |      |      |      |      |      | 0.1 | 0.1  |
| <b>Zygomycota</b>      |      |      |     |      |     |      |      |      |      |      |      |      |      |      |      |      |     |      |
| Mortierellaceae        |      |      |     |      |     |      |      |      |      |      |      | 0.1  |      | 0.2  |      | 0.2  | 0.3 | 2.9  |
| Mucoraceae             | 16.8 | 30.4 | 7.9 | 2.2  | 4.9 | 5.2  | 43.1 | 10.5 | 12.1 | 8.5  | 15.4 | 9.9  | 13.9 | 18.8 | 4.2  | 2.5  | 8.9 | 0.6  |
| Unidentified           | 1.9  | 2.0  | 5.1 | 7.4  | 5.0 | 10.1 | 0.2  | 1.2  | 2.1  | 3.5  | 5.9  | 6.1  | 3.0  | 3.4  | 4.9  | 6.0  | 9.2 | 8.1  |

Family followed by an asterisk and bold indicate the most abundant in relative abundance, whilst MOTUs with zero % were left blank in the table. Names are used as assigned by the UNITE database.
